# Supplementary material
Source: ML conference proceedings conference paper supplement (https://proceedings.mlr.press/v101/peng19a.html)
Supplement: Supplementary file [file peng19a-supp.pdf]

# Supplementary Materials

## 1 Hyperparameters for Pseudo-Label

All hyperparameters were chosen based on validation result. When tuning hyperparameters we set the data seed to 0 in all cases. Data seed only affects the split of labelled training data and unlabelled training data, it does not change the validation set or the test set. Table 1 and Table 2 show the hyperparameters used for Pseudo-Label in experiments of section 4. Table 3 and Table 4 show the hyperparameters used for Pseudo-Label in experiments of section 5.

Table 1: Hyperparameters used for Pseudo-Label when unlabelled data is clean.

| Hyperparameter | MNIST | Fashion-MNIST | CIFAR-10 |
|----------------|-------|---------------|----------|
| $a$            | 1     | 5             | 1        |
| $lr$           | 0.1   | 0.1           | 0.001    |
| $\gamma$       | 0.99  | 0.9           | 0.9      |

Table 2: Hyperparameters used for Pseudo-Label when unlabelled data is dirty.

| Hyperparameter | MNIST | Fashion-MNIST | CIFAR-10 |
|----------------|-------|---------------|----------|
| $a$            | 1     | 5             | 1        |
| $lr$           | 0.1   | 0.1           | 0.001    |
| $\gamma$       | 0.99  | 0.9           | 0.9      |

Table 3: Hyperparameters used for Pseudo-Label with weights calculated from raw images when unlabelled data is dirty.

| Hyperparameter | MNIST | Fashion-MNIST | CIFAR-10 |
|----------------|-------|---------------|----------|
| $a$            | 1     | 0.5           | 1        |
| $lr$           | 0.1   | 0.1           | 0.001    |
| $\gamma$       | 0.99  | 0.9           | 0.9      |
| $\beta$        | 10    | 10            | 20       |

Table 4: Hyperparameters used for Pseudo-Label with weights calculated from encodings when unlabelled data is dirty.

| Hyperparameter | MNIST | Fashion-MNIST | CIFAR-10 |
|----------------|-------|---------------|----------|
| $a$            | 1     | 0.5           | 1        |
| $lr$           | 0.1   | 0.1           | 0.001    |
| $\gamma$       | 0.99  | 0.9           | 0.9      |
| $\beta$        | 10    | 5             | 5        |

## 2 Hyperparameters for Mean Teacher

All hyperparameters were chosen based on validation result. When tuning hyperparameters we set the data seed to 0 in all cases. Data seed only affects the split of labelled training data and unlabelled training data, it does not change the validation set or the test set. Table 1 and Table 2 show the hyperparameters used for Mean Teacher in experiments of section 4. Table 3 and Table 4 show the hyperparameters used for Mean Teacher in experiments of section 5.

Table 5: Hyperparameters used for Mean Teacher when unlabelled data is clean.

| Hyperparameter | MNIST | Fashion-MNIST | CIFAR-10 |
|----------------|-------|---------------|----------|
| $a$            | 5     | 50            | 100      |
| $T$            | 10    | 10            | 10       |
| $lr$           | 0.3   | 0.1           | 0.001    |
| $\gamma$       | 0.999 | 0.99          | 0.9      |
| $\eta$         | 0.9   | 0.9           | 0.995    |

Table 6: Hyperparameters used for Mean Teacher when unlabelled data is dirty.

| Hyperparameter | MNIST | Fashion-MNIST | CIFAR-10 |
|----------------|-------|---------------|----------|
| $a$            | 5     | 50            | 50       |
| $T$            | 10    | 10            | 10       |
| $lr$           | 0.3   | 0.1           | 0.001    |
| $\gamma$       | 0.999 | 0.99          | 0.9      |
| $\eta$         | 0.9   | 0.9           | 0.995    |

Table 7: Hyperparameters used for Mean Teacher with weights calculated from raw images when unlabelled data is dirty.

| Hyperparameter | MNIST | Fashion-MNIST | CIFAR-10 |
|----------------|-------|---------------|----------|
| $a$            | 5     | 1             | 100      |
| $T$            | 10    | 10            | 10       |
| $lr$           | 0.3   | 0.1           | 0.001    |
| $\gamma$       | 0.999 | 0.99          | 0.9      |
| $\eta$         | 0.9   | 0.9           | 0.999    |
| $\beta$        | 10    | 10            | 2        |

Table 8: Hyperparameters used for Mean Teacher with weights calculated from encodings when unlabelled data is dirty.

| Hyperparameter | MNIST | Fashion-MNIST | CIFAR-10 |
|----------------|-------|---------------|----------|
| $a$            | 50    | 50            | 100      |
| $T$            | 10    | 10            | 10       |
| $lr$           | 0.3   | 0.1           | 0.001    |
| $\gamma$       | 0.999 | 0.99          | 0.9      |
| $\eta$         | 0.9   | 0.9           | 0.999    |
| $\beta$        | 10    | 3             | 2        |
